# Supplementary material for: Automatic Segmentation of Retinal Fluid and Photoreceptor Layer from Optical Coherence Tomography Images of Diabetic Macular Edema Patients Using Deep Learning and Associations with Visual Acuity
Source: MDPI journal article supplement (doi:10.3390/biomedicines10061269), 2022-05-29
Supplement: s1 [file s1]

Supplementary Table S1. Layers in different modules in EfficientNet-B5 [30]

|        | <b>Module 1</b>       | <b>Module 2</b>     | <b>Module 3</b>        | <b>Module 4</b>     | <b>Module 5</b>     |
|--------|-----------------------|---------------------|------------------------|---------------------|---------------------|
| Layer1 | Depthwise Convolution | Convolution         | Global Average Pooling | Multiply            | Multiply            |
| Layer2 | Batch Normalization   | Batch Normalization | Rescaling              | Convolution         | Convolution         |
| Layer3 | Activation            | Activation          | Convolution            | Batch Normalization | Batch Normalization |
| Layer4 | X                     | X                   | Convolution            | X                   | Dropout             |
